# Supplementary material for: Real-Life Effectiveness of Mepolizumab on Forced Expiratory Flow between 25% and 75% of Forced Vital Capacity in Patients with Severe Eosinophilic Asthma
Source: MDPI journal article supplement (doi:10.3390/biomedicines9111550), 2021-10-27
Supplement: s1 [file s1]

## SUPPLEMENTARY MATERIAL

**Table S1. Clinical, biological and functional effects reported during treatment with mepolizumab**

|                                       | T0                      | T6                      | p-value<br>(T0-T6) | T12                   | p-value<br>(T6-T12) | T18                 | p-value<br>(T12-T18) |
|---------------------------------------|-------------------------|-------------------------|--------------------|-----------------------|---------------------|---------------------|----------------------|
| <b>Clinical effects</b>               |                         |                         |                    |                       |                     |                     |                      |
| Asthma control test                   | 14.5(11;17.7)<br>(n=97) | 19(17;22.5)<br>(n=94)   | <0.0001            | 22(18.5;24)<br>(n=70) | 0.0002              | 23(20;24)<br>(n=58) | 0.5305               |
| ACT >20, (%)                          | 17 (17.5)               | 44 (46.8)               | <0.0001            | 49 (70)               | 0.004               | 42 (72.4)           | 0.8457               |
| Exacerbations<br>(n=84)               | 4.2 ± 2.5               | /                       | /                  | 1.1 ± 1.6<br>(n=68)   | /                   | /                   | /                    |
| OCS, (%)                              | 54 (51.4)               | 19 (18.1)               | <0.0001            | 10 (11.9)             | 0.3106              | 8(11.4)             | >0.9999              |
| <b>Biological effects</b>             |                         |                         |                    |                       |                     |                     |                      |
| Blood eosinophils<br>(cells/ $\mu$ L) | 500<br>(350; 717)       | 80<br>(40;130)          | <0.0001            | 70<br>(40; 110)       | 0.004               | 50<br>(30; 100)     | 0.0486               |
| FeNO, ppb                             | 41 (24; 61.5)<br>n=73   | 42.5 (25;<br>78.7) n=68 | ns                 | 37<br>(23;53)         | ns                  | 33<br>(1.5;44)      | ns                   |
| <b>Pulmonary function tests</b>       |                         |                         |                    |                       |                     |                     |                      |
| FEV1, % of predicted                  | 63.7 ± 17.9             | 71.9 ± 18.0             | <0.0001            | 73.9 ±16.9            | 0.303               | 77.3±17.4           | 0.461                |
| FVC, % of predicted                   | 79.9 ± 16.2             | 85.3 ± 17.2             | 0.0001             | 86.6 ± 15.5           | 0.992               | 89.3 ±16.5          | 0.416                |
| FEV1/FVC                              | 67.5 ± 13.0             | 71 ± 13.4               | <0.0001            | 71.9 ± 13.2           | 0.052               | 72.6±11.4           | 0.238                |
| FEF25-75, % of predicted              | 32.7 ± 18.2             | 40.8 ± 21.3             | <0.0001            | 45.3 ± 21.1           | <0.0001             | 48.6±18.4           | <0.0001              |

Data presented as Mean (SD), Median (IQR) and n (%).

**Table S2. Effect of mepolizumab treatment in SEA patients according to blood eosinophilia.**

|                                   | <b>eos <math>\geq 400</math></b> | <b>eos <math>&lt; 400</math></b> |               |
|-----------------------------------|----------------------------------|----------------------------------|---------------|
|                                   | n= 67                            | n=38                             | p value       |
| <b>Baseline</b>                   |                                  |                                  |               |
| FEV1, % of predicted              | 60 (46-77)                       | 68.5 (61.8-75.3)                 | <b>0.05</b>   |
| FVC, % of predicted               | 80 (67-90)                       | 83.5 (76.5- 92.3)                | ns            |
| FEV1/FVC                          | 66 (56.7-71)                     | 73 (67-83.3)                     | <b>0.0001</b> |
| FEF25-75, % of predicted          | 25 (14-45)                       | 35 (23.5-48)                     | ns            |
| Asthma control test               | 14 (11- 16)                      | 15 (9- 20)                       | ns            |
| <b>6 months</b>                   |                                  |                                  |               |
| FEV1, % of predicted              | 73.5 (55- 87)                    | 73 (64-81.5)                     | ns            |
| FVC, % of predicted               | 88 (71.5- 96.5)                  | 85 (79- 84)                      | ns            |
| FEV1/FVC                          | 69 (60.5-75.8)                   | 75 (67.5-85)                     | <b>0.0035</b> |
| FEF25-75, % of predicted          | 35.5 (22.3-53)                   | 37 (29.5-54.5)                   | ns            |
| Asthma control test               | 18-5 (17-22)                     | 20 (17- 23)                      | ns            |
| <b>12 months</b>                  |                                  |                                  |               |
| FEV1, % of predicted              | 71.5 (56.3- 89.3)                | 73(66-85)                        | ns            |
| FVC, % of predicted               | 86 (74-100.8)                    | 87 (81- 92)                      | ns            |
| FEV1/FVC                          | 69 (63.1-75)                     | 76 (72- 85)                      | <b>0.001</b>  |
| FEF25-75, % of predicted          | 45 (24-58)                       | 47 (30-58)                       | ns            |
| Asthma control test               | 22 (19-24)                       | 22.5 (15.3-24)                   |               |
| <b>18 months</b>                  |                                  |                                  |               |
| FEV1, % of predicted              | 75 (64.3-87.8)                   | 76 (71-91)                       | ns            |
| FVC, % of predicted               | 90.5 (76- 98)                    | 88 (80- 97)                      | ns            |
| FEV1/FVC                          | 69 (63-75)                       | 78 (72-82)                       | <b>0.001</b>  |
| FEF25-75, % of predicted          | 47 (27-61)                       | 58 (32-66)                       | ns            |
| Asthma control test               | 23 (21-24)                       | 22 (15.3- 24)                    | ns            |
| <b>exacerbation rate</b>          |                                  |                                  |               |
| Baseline                          | 4 (3- 5)                         | 3 (2 - 5)                        | ns            |
| 12 months of mepolizumab          | 0 (0- 2)                         | 0 (0-1)                          | ns            |
| <b>Difference from baseline</b>   |                                  |                                  |               |
| <b>After 6 months</b>             |                                  |                                  |               |
| $\Delta$ FEV1, % of predicted     | 9.5 (1-18.3)                     | 6 (1-10)                         | ns            |
| $\Delta$ FVC, % of predicted      | 5 (-4- 15.3)                     | 3 (-0.5 - 8)                     | ns            |
| $\Delta$ FEV1/FVC                 | 4.1 (1.7-8.2)                    | 2 (-0.5 - 5)                     | ns            |
| $\Delta$ FEF25-75, % of predicted | 5 (1-17)                         | 6 (0-13.5)                       | ns            |
| $\Delta$ Asthma control test      | 4 (2.8- 7.3)                     | 4 (2- 6.5)                       | ns            |
| <b>After 12 months</b>            |                                  |                                  |               |
| $\Delta$ FEV1, % of predicted     | 12 (6.3-19)                      | 7 (0-12)                         | <b>0.0148</b> |
| $\Delta$ FVC, % of predicted      | 5.5 (-1, 16.8)                   | 2 (-1 - 8)                       | ns            |
| $\Delta$ FEV1/FVC                 | 5.4 (1-11.4)                     | 3 (1- 6)                         | ns            |

|                           |                |           |               |
|---------------------------|----------------|-----------|---------------|
| ΔFEF25-75, % of predicted | 13 (5-22.3)    | 8 (3-12)  | <b>0.0437</b> |
| ΔAsthma control test      | 8 (5- 9)       | 5 (1- 8)  | <b>0.0445</b> |
| <b>After 18 months</b>    |                |           |               |
| ΔFEV1, % of predicted     | 11 (4.3- 19.5) | 9 (4-14)  | ns            |
| ΔFVC, % of predicted      | 5 (-1, 14.5)   | 7 (1- 11) | ns            |
| ΔFEV1/FVC                 | 5.1 (1.8-12.3) | 5 (1- 8)  | ns            |
| ΔFEF25-75, % of predicted | 12 (5.3-22.5)  | 15 (9-20) | ns            |
| ΔAsthma control test      | 8 (4-10)       | 5 (2-7)   | <b>0.0336</b> |

**Table S3. Effect of mepolizumab treatment in SEA patients according to OCS use.**

|                                        | <b>OCS</b>        | <b>No OCS</b>     |               |
|----------------------------------------|-------------------|-------------------|---------------|
|                                        | n= 54             | n=51              | p value       |
| <b>Baseline</b>                        |                   |                   |               |
| FEV1, % of predicted                   | 62 (46.7- 73)     | 67 (54-83)        | ns            |
| FVC, % of predicted                    | 79.5 (66.3- 86.3) | 86 (69-95)        | <b>0.0264</b> |
| FEV1/FVC                               | 65.5 (55-74.5)    | 70 (65-80.5)      | <b>0.0094</b> |
| FEF25-75, % of predicted               | 26 (13.5- 43.5)   | 32 (23-48)        | <b>0.0547</b> |
| Peripheral blood eosinophils, cells/μL | 560 (365 - 820)   | 400 (330-600)     | <b>0.0114</b> |
| Asthma control test                    | 14 (11- 16)       | 14 (9- 20)        | ns            |
| <b>6 months</b>                        |                   |                   |               |
| FEV1, % of predicted                   | 71.5 (54.7-82.7)  | 79 (59.5-86.5)    | ns            |
| FVC, % of predicted                    | 85.5 (73.5-93)    | 88(76-98.5)       | ns            |
| FEV1/FVC                               | 69 (59.3-76)      | 73 (66-84)        | <b>0.0097</b> |
| FEF25-75, % of predicted               | 35.5 (21.7- 53.3) | 37 (30- 55)       | ns            |
| Asthma control test                    | 18.5 (17- 21)     | 20 (18- 23)       | ns            |
| <b>12 months</b>                       |                   |                   |               |
| FEV1, % of predicted                   | 71(60-84)         | 74 (62-92.5)      | ns            |
| FVC, % of predicted                    | 85 (75-94)        | 89 (74.8-102)     | ns            |
| FEV1/FVC                               | 69 (55-73)        | 75 (68.2-85)      | <b>0.0005</b> |
| FEF25-75, % of predicted               | 48 (22-58)        | 45 (30- 59)       | ns            |
| Peripheral blood eosinophils, cells/μL | 80 (47.5- 122.3)  | 60 (30- 105)      | ns            |
| Asthma control test                    | 21.5 (18.8- 24)   | 22 (18- 24)       | ns            |
| <b>18 months</b>                       |                   |                   |               |
| FEV1, % of predicted                   | 75 (54.7-82.7)    | 77 (65.5- 92.5)   | ns            |
| FVC, % of predicted                    | 87.5 (75.7-93)    | 91 (77.5- 103)    | ns            |
| FEV1/FVC                               | 71.1 (61.7-75.5)  | 76 (68.2-79.7)    | <b>0.0236</b> |
| FEF25-75, % of predicted               | 52 (39.8- 62.3)   | 47.5 (31.3- 62.5) | ns            |
| Asthma control test                    | 22 (20- 24)       | 23 (19- 24)       | ns            |
| <b>exacerbation rate</b>               |                   |                   |               |

|                                 |                  |                 |               |
|---------------------------------|------------------|-----------------|---------------|
| Baseline                        | 4 (3-5)          | 3 (2- 5.3)      | ns            |
| 12 months of mepolizumab        | 1 (0- 2)         | 0 (0- 1)        | ns            |
| <b>Difference from baseline</b> |                  |                 |               |
| <b>After 6 months</b>           |                  |                 |               |
| ΔFEV1, % of predicted           | 6.5 (0.7-16)     | 6 (2-17.5)      | ns            |
| ΔFVC, % of predicted            | 3.5 (-1.5 -32.3) | 3 (-3.5- 13.5)  | ns            |
| ΔFEV1/FVC                       | 4 (-0.4 -8)      | 4 (0- 8)        | ns            |
| ΔFEF25-75, % of predicted       | 6 (-0.5 - 17.5)  | 5 (2.5 -9)      | ns            |
| ΔAsthma control test            | 4 (3- 6)         | 4 (0- 9)        | ns            |
| <b>After 12 months</b>          |                  |                 |               |
| ΔFEV1, % of predicted           | 10 (2-15)        | 9.5 (3.3- 18.5) | ns            |
| ΔFVC, % of predicted            | 3 (-2 - 13)      | 5 (0-13)        | ns            |
| ΔFEV1/FVC                       | 5 (0-7)          | 4 (1- 11)       | ns            |
| ΔFEF25-75, % of predicted       | 14 (4.8- 23)     | 7 (5- 13)       | <b>0.0418</b> |
| ΔAsthma control test            | 6 (4.8- 8)       | 2 (6.5- 11)     | ns            |
| <b>After 18 months</b>          |                  |                 |               |
| ΔFEV1, % of predicted           | 10.5 (4.7-15)    | 8 (2.5-17.5)    | ns            |
| ΔFVC, % of predicted            | 4 (-0.3 - 12)    | 7 (-0.5 - 16)   | ns            |
| ΔFEV1/FVC                       | 5.1 (0.75- 11)   | 5 (1-12)        | ns            |
| ΔFEF25-75, % of predicted       | 18 (9- 34)       | 11 (6- 18.5)    | <b>0.0445</b> |
| ΔAsthma control test            | 7.5 (5- 9)       | 5 (2- 10.5)     | ns            |

**Figure S1 – Comparison among subgroups of patients with different baseline eosinophil levels.**

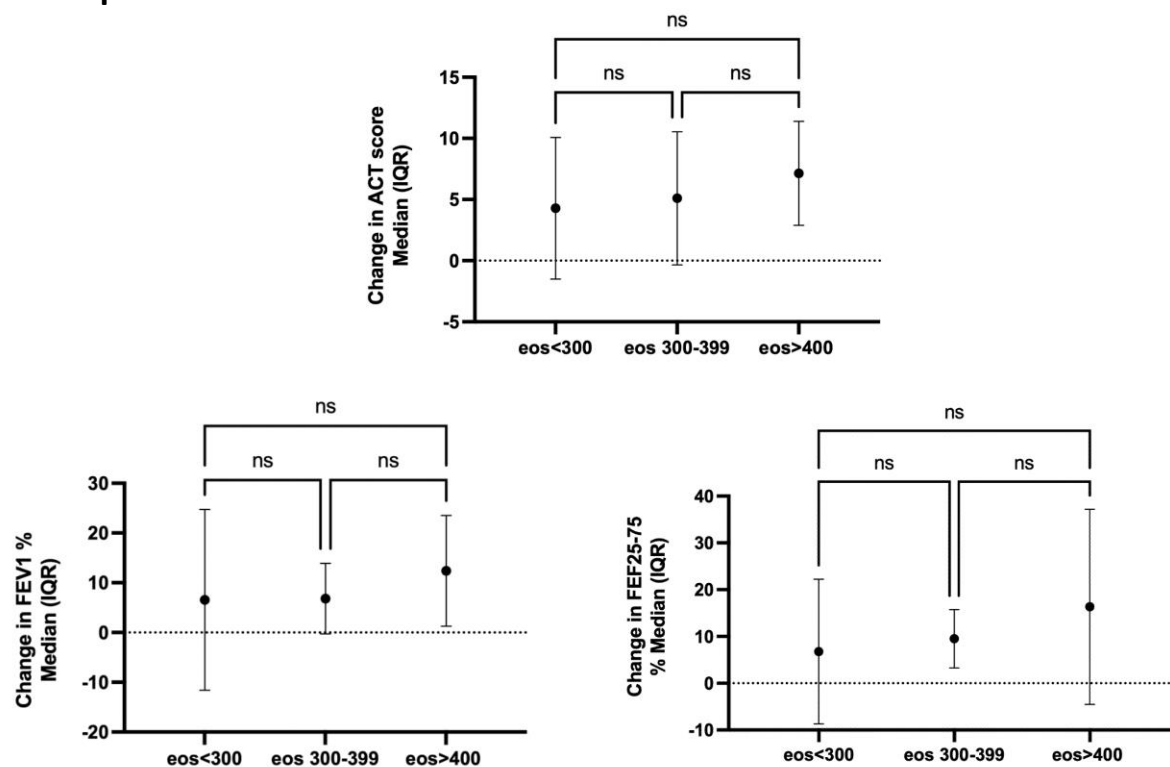

**Figure S1. Effects of mepolizumab, according to level of blood eosinophilia (blood eosinophils <300 cells/μL, between 300-399 cells/μL and ≥400 cells/μL) in regard to a) change in ACT score, b) change in FEV1, c) change in FEF25-75 at 12 months follow-up compared to baseline.**
